1 **HB-PLS: An algorithm for identifying biological process or pathway regulators by**  
2 **integrating Huber loss and Berhu penalty with partial least squares regression**

3  
4 Wenping Deng<sup>1</sup>, Kui Zhang<sup>2</sup>, Zhigang Wei<sup>3</sup>, Lihu Wang<sup>3</sup>, Cheng He<sup>5</sup>, Sanzhen Liu<sup>5§</sup> and Hairong Wei<sup>1§</sup>

5  
6 <sup>1</sup>College of Forest Resources and Environmental Science, Michigan Technological University, Houghton,  
7 Michigan 49931, United States of America. <sup>2</sup>Department of Mathematics, Michigan Technological  
8 University, Houghton, Michigan 49931, United States of America. <sup>3</sup>Research Center of Saline and Alkali  
9 Land of State Forestry and Grassland Administration, Chinese Academy of Forestry, Beijing 100091, P. R.  
10 China. <sup>4</sup>College of Landscape and Ecological Engineering, Hebei University of Engineering, Hebei 056038,  
11 P. R. China. <sup>5</sup>Department of Plant Pathology, Kansas State University, Manhattan, Kansas 66506, United  
12 States of America.

13  
14 <sup>§</sup>Address correspondence to S.L. (liu3zhen@ksu.edu) and H.W. (hairong@mtu.edu)

15  
16  
17 **Abstract**

18 Gene expression data features high dimensionality, multicollinearity, and the existence of outlier  
19 or non-Gaussian distribution noise, which make the identification of true regulatory genes  
20 controlling a biological process or pathway difficult. In this study, we embedded the Huber-Berhu  
21 (HB) regression into the partial least squares (PLS) framework and created a new method called  
22 HB-PLS for predicting biological process or pathway regulators through construction of regulatory  
23 networks. PLS is an alternative to ordinary least squares (OLS) for handling multicollinearity in  
24 high dimensional data. The Huber loss is more robust to outliers than square loss, and the Berhu  
25 penalty can obtain a better balance between the  $\ell_2$  penalty and the  $\ell_1$  penalty. HB-PLS therefore  
26 inherits the advantages of the Huber loss, the Berhu penalty, and PLS. To solve the Huber-Berhu  
27 regression, a fast proximal gradient descent method was developed; the HB regression runs much  
28 faster than CVX, a Matlab-based modeling system for convex optimization. Implementation of  
29 HB-PLS to real transcriptomic data from *Arabidopsis* and maize led to the identification of many  
30 pathway regulators that had previously been identified experimentally. In terms of its efficiency  
31 in identifying positive biological process or pathway regulators, HB-PLS is comparable to sparse  
32 partial least squares (SPLS), a very efficient method developed for variable selection and

33 dimension reduction in handling multicollinearity in high dimensional genomic data. However,  
34 HB-PLS is able to identify some distinct regulators, and in one case identify more positive  
35 regulators at the top of output list, which can reduce the burden for experimental test of the  
36 identified candidate targets. Our study suggests that HB-PLS is instrumental for identifying  
37 biological process and pathway genes.

38

39 **Key words:** Huber regression, Berhu regression, partial least squares regression, sparse partial  
40 least squares, Huber-Berhu partial least squares, pathway, gene regulatory network,

41

## 42 **Introduction**

43 In a gene regulatory network (GRN), a node corresponds to a gene and an edge represents a  
44 directional regulatory relationship between a transcription factor (TF) and a target gene.  
45 Understanding the regulatory relationships among genes in GRNs can help elucidate the various  
46 biological processes and underlying mechanisms in a variety of organisms. Although experiments  
47 can be conducted to acquire evidence of gene regulatory interactions, these are labor-intensive and  
48 time-consuming. In the past two decades, the advent of high-throughput techniques, including  
49 microarray and RNA-Seq, have generated an enormous wealth of transcriptomic data. As the data  
50 in public repositories grows exponentially, computational algorithms and tools utilizing gene  
51 expression data offer a more time- and cost-effective way to reconstruct GRNs. To this end,  
52 efficient mathematical and statistical methods are needed to infer qualitative and quantitative  
53 relationships between genes.

54 Many methods have been developed to reconstruct GRNs, each employing different theories and  
55 principles. The earliest methods involved differential equations [1], Boolean networks [2],  
56 stochastic networks [3], Bayesian [4, 5] or dynamic Bayesian networks (BN) [6, 7], and ordinary  
57 differential equations (ODE) [8]. Some of these methods require time series datasets with short  
58 time intervals, such as those generated from easily manipulated single cell organisms (e.g. bacteria,  
59 yeast) or mammalian cell lines [9]. For this reason, most of these methods are not suitable for gene  
60 expression data, especially time series data involving time intervals on the scale of days, from  
61 multicellular organisms like plants and mammals (except cell lines).

62

63 In general, the methods that are useful for building gene networks with non-time series data  
64 generated from high plants and mammals include ParCorA [10], GGM [11], and mutual  
65 information-based methods such as Relevance Network (RN) [12], Algorithm for the  
66 Reconstruction of Accurate Cellular Networks (ARACNE) [13], C3NET [14], maximum  
67 relevance/minimum redundancy Network (MRNET) [15], and random forests [16, 17]. Most of  
68 these methods use the information-theoretic framework. For instance, Relevance Network (RN)  
69 [18], one of the earliest methods, infers a network in which a pair of genes are linked by an edge  
70 if the mutual information is larger than a given threshold. The context likelihood relatedness (CLR)  
71 algorithm [19], an extension of RN, derives a score from the empirical distribution of the mutual  
72 information for each pair of genes and eliminates edges with scores that are not statistically  
73 significant. ARACNE [20] is similar to RN; however, ARACNE makes use of the data processing  
74 inequality (DPI) to eliminate the least significant edge of a triplet of genes, which decreases the  
75 false positive rate of the inferred network. MRNET [21] employs the maximum relevance and  
76 minimum redundancy feature selection method to infer GRNs. Finally, triple-gene mutual  
77 interaction (TGMI) uses condition mutual information to evaluate triple gene blocks to infer gene  
78 regulatory networks [22]. Information theory-based methods are used extensively for constructing  
79 GRNs and for building large networks because they have a low computational complexity and are  
80 able to capture nonlinear dependencies. However, there are also disadvantages in using mutual  
81 information, including high false-positive rates [23] and the inability to differentiate positive  
82 (activating), negative (inhibiting), and indirect regulatory relationships. Reconstruction of the  
83 transcriptional regulatory network can be implemented by the neighborhood selection method.  
84 Neighborhood selection [24] is a sub-problem of covariance selection. Assume  $\Gamma$  is a set  
85 containing all of the variables (genes), the neighborhood  $ne_a$  of a variable  $a \in \Gamma$  is the smallest  
86 subset of  $\Gamma \setminus \{a\}$  such that, given all variables in  $ne_a$ , variable  $a$  is conditionally independent of all  
87 remaining variables. Given  $n$  i.i.d. observations of  $\Gamma$ , neighborhood selection aims to estimate the  
88 neighborhood of each variable in  $\Gamma$  individually. The neighborhood selection problem can be cast  
89 as a multiple linear regression problem and solved by regularized methods.

90

91 Following the differential equation in [25], the expression levels of a target gene  $y$  and the  
92 expression levels of the TF genes  $x$  form a linear relationship:

$$93 \quad y_i = \alpha^* + x_i^T \beta^* + \varepsilon_i \quad i = 1, 2, \dots, n \quad (1)$$

94 where  $n$  is the number of samples,  $x_i = (x_{i1}, \dots, x_{ip})^T$  is the expression level of  $p$  TF genes, and  
95  $y_i$  is the expression level of the target gene in sample  $i$ .  $\alpha^*$  is the intercept and  $\beta^* = (\beta_1^*, \dots, \beta_p^*)^T$   
96 are the associated regression coefficients; if  $\beta_j^* \neq 0$ , then TF gene  $j$  regulates target gene  $i$ .  $\{\varepsilon_i\}$   
97 are independent and identically distributed random errors with mean 0 and variance  $\sigma^2$ . The  
98 method to get an approximation  $\hat{\beta}$  for  $\beta^*$  is to transform this statistical problem to a convex  
99 optimization problem:

$$100 \quad \hat{\beta} = \operatorname{argmin}_{\beta} f(\beta) = \operatorname{argmin}_{\beta} \sum_{i=1}^n L(y_i - \alpha - x_i^T \beta) + \lambda P(\beta) \quad (2)$$

101 where  $L(\cdot)$  is a loss function,  $P(\cdot)$  is a penalization function, and  $\lambda > 0$  is a tuning parameter  
102 which determines the importance of penalization. Different loss functions, penalization functions,  
103 and methods for determining  $\lambda$  have been proposed in the literature. Ordinary least squares (OLS)  
104 is the simplest method with a square loss function  $L(y_i - \alpha - x_i^T \beta) = (y_i - \alpha - x_i^T \beta)^2$  and no  
105 penalization function. The OLS estimator is unbiased. However, since it is common for the number  
106 of genes,  $p$ , to be much larger than the number of samples,  $n$ , (i.e.  $p \gg n$ ) in any given gene  
107 expression data set, there is no unique solution for OLS. Even when  $n > p$ , OLS estimation  
108 features high variance. To conquer these problems, ridge regression [26] adds a  $\ell_2$  penalty,  
109  $P(\beta) = \sum_{j=1}^p \beta_j^2$ , on the coefficients which introduces a bias but reduces the variance of the  
110 estimated  $\hat{\beta}$ . In ridge regression, there is a unique solution even for the  $p > n$  case. Least absolute  
111 shrinkage and selection operator [27] is similar to ridge regression, except the  $\ell_2$  penalty in ridge  
112 regression is replaced by the  $\ell_1$  penalty,  $P(\beta) = \sum_{j=1}^p |\beta_j|$ .

113 The main benefit of LASSO is that it performs variable selection and regularization simultaneously  
114 thereby generating a sparse solution, a desirable property for constructing GRNs. When LASSO  
115 is used for selecting regulatory TFs for a target gene, there are two potential limitations. First, if  
116 several TF genes are correlated and have large effects on the target gene, LASSO has a tendency  
117 to choose only one TF gene while zeroing out the other TF genes. Second, some studies [28] state  
118 that LASSO does not have oracle properties; that is, it does not have the capability to identify the  
119 correct subset of true variables or to have an optimal estimation rate. It is claimed that there are  
120 cases where a given  $\lambda$  that leads to optimal estimation rate ends up with an inconsistent selection  
121 of variables. For the first limitation, Zou and Hastie [29] proposed elastic net, in which the penalty

122 is a mixture of LASSO and ridge regressions:  $P(\beta) = \alpha \sum_{j=1}^p |\beta_j| + \frac{(1-\alpha)}{2} \sum_{j=1}^p \beta_j^2$ , where  $\alpha$  ( $0 <$   
123  $\alpha < 1$ ) is called the elastic net mixing parameter. When  $\alpha = 1$ , the elastic net penalty becomes  
124 the LASSO penalty; when  $\alpha = 0$ , the elastic net penalty becomes the ridge penalty. For the second  
125 limitation, adaptive LASSO [28] was proposed as a regularization method, which enjoys the oracle  
126 properties. The penalty function for adaptive LASSO is:  $P(\beta) = \sum_{j=1}^p \hat{w}_j |\beta_j|$ , where adaptive  
127 weight  $\hat{w}_j = \frac{1}{|\hat{\beta}_{ini}|^\gamma}$ , and  $\hat{\beta}_{ini}$  is an initial estimate of the coefficients obtained through ridge  
128 regression or LASSO;  $\gamma$  is a positive constant, and is usually set to 1. It is evident that adaptive  
129 LASSO penalizes more those coefficients with lower initial estimates.

130  
131 It is well known that the square loss function is sensitive to heavy-tailed errors or outliers.  
132 Therefore, adaptive LASSO may fail to produce reliable estimates for datasets with heavy-tailed  
133 errors or outliers, which commonly appear in gene expression datasets. One possible remedy is to  
134 remove influential observations from the data before fitting a model, but it is difficult to  
135 differentiate true outliers from normal data. The other method is to use robust regression. Wang et  
136 al. [30] combined the least absolute deviation (LAD) and weighted LASSO penalty to produce the  
137 LAD-LASSO method. The objective function is:

$$138 \quad \sum_{i=1}^n |y_i - \alpha - x_i^T \beta| + \lambda \sum_{j=1}^p \hat{w}_j |\beta_j| \quad (3)$$

139 With this LAD loss, LAD-LASSO is more robust than OLS to unusual  $y$  values, but it is sensitive  
140 to high leverage outliers. Moreover, LAD estimation degrades the efficiency of the resulting  
141 estimation if the error distribution is not heavy tailed [31]. To achieve both robustness and  
142 efficiency, Lambert-Lacroix et al. [32] proposed Huber-LASSO, which combined the Huber loss  
143 function and a weighted LASSO penalty. The Huber function (see Materials and Methods) is a  
144 hybrid of squared error for relatively small errors and absolute error for relatively large ones. Owen  
145 [33] proposed the use of the Huber function as a loss function and the use of a reversed version of  
146 Huber's criterion, called Berhu, as a penalty function. For the Berhu penalty (see Materials and  
147 Methods), relatively small coefficients contribute their  $\ell_1$  norm to the penalty while larger ones  
148 cause it to grow quadratically. This Berhu penalty sets some coefficients to 0, like LASSO, while  
149 shrinking larger coefficients in the same way as ridge regression. In [34], the authors showed that  
150 the combination of the Huber loss function and an adaptive Berhu penalty enjoys oracle properties,

151 and they also demonstrated that this procedure encourages a grouping effect. In [33, 34], the  
152 authors solved a Huber-Berhu optimization problem using CVX software [35], a Matlab-based  
153 modeling system for convex optimization. CVX turns Matlab into a modeling language, allowing  
154 constraints and objectives to be specified using standard Matlab expression syntax. However, since  
155 CVX is slow for large datasets, a proximal gradient descent algorithm was developed for the  
156 Huber-Berhu regression in this study, which runs much faster than CVX.

157  
158 Reconstruction of gene regulatory networks often involves ill-posed problems due to high  
159 dimensionality and multicollinearity. Partial least squares (PLS) regression has been an alternative  
160 to ordinary regression for handling multicollinearity in several areas of scientific research. PLS  
161 couples a dimension reduction technique and a regression model. Although PLS has been shown  
162 to have good predictive performance in dealing with ill-posed problems, it is not particularly  
163 tailored for variable selection. Chun et al. [36] first proposed a SPLS regression for simultaneous  
164 dimension reduction and variable selection. Cao et al. [37] also proposed a sparse PLS method for  
165 variable selection when integrating omics data. They added sparsity into PLS with a LASSO  
166 penalization combined with singular value decomposition (SVD) computation. In this study, the  
167 Huber-Berhu regression was embedded into a PLS framework. Real gene data was used to  
168 demonstrate that this approach is applicable for the reconstruction of GRNs.

169

## 170 **Materials and Methods**

171

### 172 **High-throughput gene expression data**

173 The lignin pathway analysis used an *Arabidopsis* wood formation compendium dataset containing  
174 128 Affymetrix microarrays pooled from six experiments (accession identifiers: GSE607,  
175 GSE6153, GSE18985, GSE2000, GSE24781, and GSE5633 in NCBI Gene Expression Omnibus  
176 (GEO) (<http://www.ncbi.nlm.nih.gov/geo/>)). These datasets were originally obtained from  
177 hypocotyledonous stems under short-day conditions known to induce secondary wood formation  
178 [38]. The original CEL files were downloaded from GEO and preprocessed using the affy package  
179 in Bioconductor (<https://www.bioconductor.org/>) and then normalized with the robust multi-array  
180 analysis (RMA) algorithm in affy package. This compendium data set was also used in our  
181 previous studies [39, 40]. The maize B73 compendium data set used for predicting photosynthesis

182 light reaction (PLR) pathway regulators was downloaded from three NCBI databases: (1) the  
183 sequence read archive (SRA) (<https://www.ncbi.nlm.nih.gov/sra>), 39 leaf samples from  
184 ERP011838; (2) Gene Expression Omnibus (GEO), 24 leaf samples from GSE61333, and (3)  
185 BioProject (<https://www.ncbi.nlm.nih.gov/bioproject/>), 36 seedling samples from PRJNA483231.  
186 This compendium is a subset of that used in our earlier co-expression analysis [41]. Raw reads  
187 were trimmed to remove adaptors and low-quality base pairs via Trimmomatic (v3.3). Clean reads  
188 were aligned to the B73Ref3 with STAR, followed by the generation of normalized FPKM  
189 (fragments per kb of transcript per million reads) using Cufflinks software (v2.1.1) [42].

190

### 191 **Huber and Berhu functions**

192 In estimating regression coefficients, the square loss function is well suited if  $y_i$  follows a  
193 Gaussian distribution, but it gives a poor performance when  $y_i$  follows a heavy-tailed distribution  
194 or there are outliers. On the other hand, the LAD loss function is more robust to outliers, but the  
195 statistical efficiency is low when there are no outliers in the data. The Huber function, introduced  
196 in [43], is a combination of linear and quadratic loss functions. For any given positive real  $M$   
197 (called shape parameter), the Huber function is defined as:

$$198 \quad H_M(z) = \begin{cases} z^2 & |z| \leq M \\ 2M|z| - M^2 & |z| > M \end{cases} \quad (4)$$

199 This function is quadratic for small  $z$  but grows linearly for large values of  $z$ . The parameter  $M$   
200 determines where the transition from quadratic to linear takes place (see Figure 1, top left). In this  
201 study, the default value of  $M$  was set to be one tenth of the interquartile range (IRQ), as suggested  
202 by [44]. The Huber function is a smooth function with a derivative function:

$$203 \quad H'_M(z) = \begin{cases} 2z & |z| \leq M \\ 2M \operatorname{sign}(z) & |z| > M \end{cases} \quad (5)$$

204 The ridge regression uses the quadratic penalty on regression coefficients, and it is equivalent to  
205 putting a Gaussian prior on the coefficients. LASSO uses a linear penalty on regression coefficients,  
206 and it is equivalent to putting a Laplace prior on the coefficients. The advantage of LASSO over  
207 ridge regression is that it implements regularization and variable selection simultaneously. The  
208 disadvantage is that, if a group of predictors is highly correlated, LASSO picks only one of them  
209 and shrinks the others to zero. In this case, the prediction performance of ridge regression  
210 dominates the LASSO. The Berhu function, introduced in [33], is a hybrid of these two penalties.



211 It gives a quadratic penalty to large coefficients while giving a linear penalty to small coefficients,  
 212 as shown in Figure 1 (top right). The Berhu function is defined as:

$$213 \quad B_M(z) = \begin{cases} |z| & |z| \leq M \\ \frac{z^2 + M^2}{2M} & |z| > M \end{cases} \quad (6)$$

214 The shape parameter  $M$  was set to be the same as that in the Huber function. As shown in Figure  
 215 1 (top right), the Berhu function is a convex function, but it is not differentiable at  $z = 0$ . Figure  
 216 1 (bottom) also shows the 2D contour of Huber and Berhu functions. When the Huber loss function  
 217 and the Berhu penalty were combined, an objective function, as referred as Huber\_Berhu, was  
 218 obtained, as shown below.

$$219 \quad f(\beta) = \sum_{i=1}^n H_M(y_i - x_i^T \beta) + \lambda \sum_{j=1}^P B_M(\beta_j) \quad (7)$$

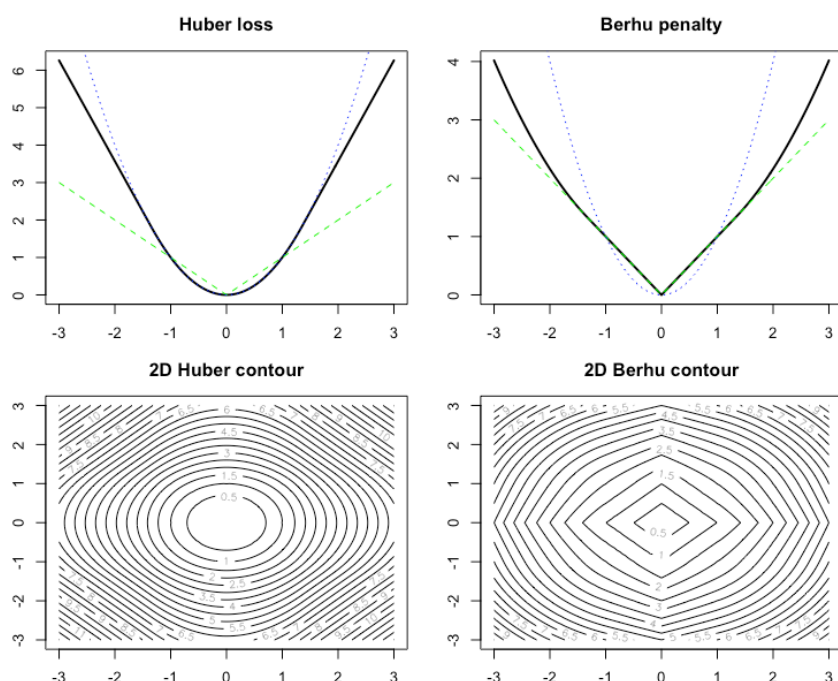

220  
 221 Figure 1. Huber loss function (top left) and Berhu penalty function (top right) as well as their 2D  
 222 contours (bottom row).

223  
 224 Figure 2 provides insight into the estimation of coefficients for the Huber\_Berhu (left), LASSO  
 225 (middle), and ridge (right) regressions. The Huber loss corresponds to the rotated, rounded  
 226 rectangle contour in the top right corner, and the center of the contour is the solution of the un-



227 penalized Huber regression. The shaded area is a map of the Berhu constraint where a smaller  $\lambda$   
 228 corresponds to a larger area. The estimated coefficient of the Huber\_Berhu regression is the first  
 229 place the contours touch the shaded area; when  $\lambda$  is small, the touch point is not on the axes, which  
 230 means the Huber\_Berhu regression behaves more like the ridge regression, which does not  
 231 generate a sparse solution. When  $\lambda$  increases, the correspondent shaded area changes to a diamond,  
 232 and the touch point is more likely to be located on the axes. Therefore, for large  $\lambda$ , the  
 233 Huber\_Berhu regression behaves like Lasso, which can generate a sparse solution.  
 234

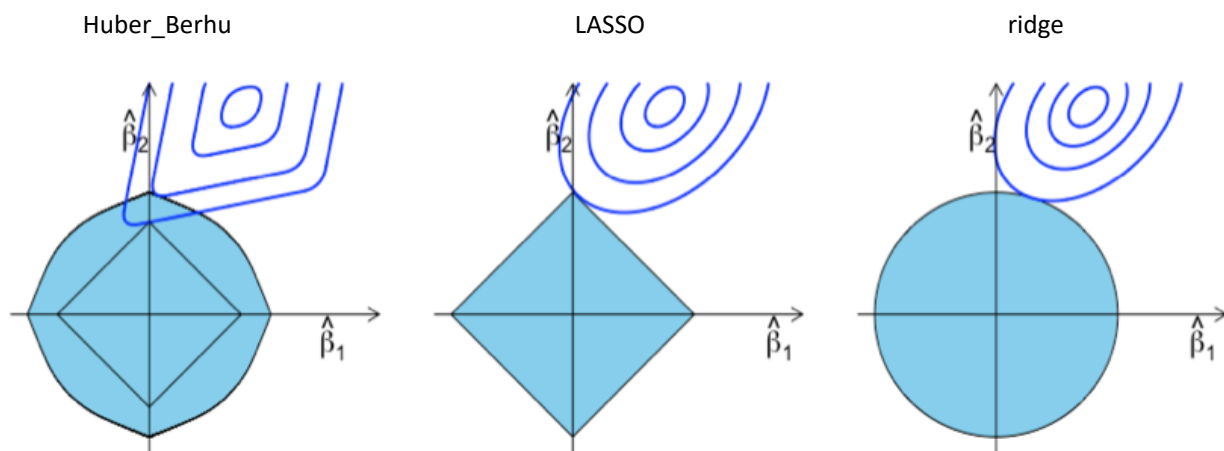

235 Figure 2. Estimation picture for the Huber\_Berhu regression (left). As a comparison, the estimation  
 236 pictures for the LASSO (middle) and ridge (right) regressions are also shown.

237

### 238 **The algorithm to solve the Huber-Berhu regression**

239 Since the Berhu function is not differentiable at  $z = 0$ , it is difficult to use the gradient descent  
 240 method to solve equation (4). Although we can use the general convex optimization solver CVX  
 241 [35] for a convex optimization problem, it is too slow for real biological applications. Therefore,  
 242 a proximal gradient descent algorithm was developed to solve equation (4). Proximal gradient  
 243 descent is an effective algorithm to solve an optimization problem with decomposable objective  
 244 function. Suppose the objective function can be decomposed as  $f(x) = g(x) + h(x)$ , where  $g(x)$   
 245 is a convex differentiable function and  $h(x)$  is a convex non-differentiable function. The idea  
 246 behind the proximal gradient descent [45] method is to make a quadratic approximation to  $g(x)$   
 247 and leave  $h(x)$  unchanged. That is:

$$248 \quad f(z) = g(z) + h(z) \approx g(x) + \nabla g(x)^T (z - x) + \frac{1}{2t} \|z - x\|_2^2 + h(z)$$

249 At each step,  $x$  is updated by the minimum of the right side of (5).

$$250 \quad x^+ = \operatorname{argmin}_z g(x) + \nabla g(x)^T(z - x) + \frac{1}{2t} \|z - x\|_2^2 + h(z)$$

$$251 \quad = \operatorname{argmin}_z \frac{1}{2t} \|z - (x - t\nabla g(x))\|_2^2 + h(z)$$

252 The operator  $\operatorname{Prox}_{t,h}(x) = \operatorname{argmin}_z \frac{1}{2t} \|z - x\|_2^2 + h(z)$  is called proximal mapping for  $h$ .

253 Therefore to solve (4), the key is to compute the proximal mapping for the Berhu function:

$$254 \quad \lambda B_M(z) = \lambda |z| 1_{|z| \leq M} + \lambda \frac{z^2 + M^2}{2M} 1_{|z| > M} = \lambda |z| + \lambda \frac{(|z| - M)^2}{2M} 1_{|z| > M}$$

255 let  $u(z) = \lambda \frac{(|z| - M)^2}{2M} 1_{|z| > M}$ . As  $u(z)$  satisfies theorem 4 in [46]:

$$256 \quad \operatorname{Prox}_{t,\lambda B}(x) = \operatorname{Prox}_{t,\lambda u}(x) \circ \operatorname{Prox}_{t,\lambda|\cdot|}(x) \quad (8)$$

257 It is not difficult to verify:

$$258 \quad \operatorname{Prox}_{t,\lambda u}(x) = \operatorname{sign}(x) \min \left\{ |x|, \frac{M}{M + t\lambda} (|x| + t\lambda) \right\} \quad (9)$$

$$259 \quad \operatorname{Prox}_{t,\lambda|\cdot|}(x) = \operatorname{sign}(x) \min\{|x| - t\lambda, 0\} \quad (10)$$

260

---

Algorithm 1: Accelerated proximal gradient descent method to solve equation (7)

---

Input: predictor matrix ( $X$ ), dependent vector ( $y$ ), and penalty constant ( $\lambda$ )

Output: regression coefficient ( $\beta$ )

1 Initiate  $\beta = \mathbf{0}$ ,  $t=1$ ,  $\beta_{prev} = \mathbf{0}$

2 For  $k$  in  $1 \dots \text{MAX\_ITER}$

3  $v = \beta + (k/(k+3)) * (\beta - \beta_{prev})$

4 compute the gradient of Huber loss at  $v$  using (5), denoted as  $G_v$

5 while TRUE

6 compute  $p_1 = \operatorname{Prox}_{t,\lambda|\cdot|}(v)$  using (9)

7 compute  $p_2 = \operatorname{Prox}_{t,\lambda u}(p_1)$  using (10)

8 if  $\sum_{i=1}^n H_M(y_i - x_i^T p_2) \leq \sum_{i=1}^n H_M(y_i - x_i^T v) + G'_v(p_2 - v) + \frac{1}{2t} \|p_2 - v\|_2^2$

9 break

10 else  $t=t*0.5$

11  $\beta_{prev} = \beta$ ,  $\beta = p_2$

261           12    if converged  
              13    break

262 Algorithm 1 uses the accelerated proximal gradient descent method to solve (7). Line 3 implements  
263 the acceleration of [47]. Lines 6-7 compute the proximal mapping of the Berhu function. Lines 5-  
264 10 use a backtracking method to determine the step size.

265

## 266 **Embedding the Huber-Berhu regression into PLS**

267 Let  $X$  ( $n \times p$ ) and  $Y$  ( $n \times q$ ) be the standardized predictor variables (TF genes) and dependent  
268 variables (pathway genes), respectively. PLS [48] looks for a linear combination of  $X$  and a linear  
269 combination of  $Y$  such that their covariance reaches a maximum:

$$270 \quad \max_{\|u\|_2=1, \|v\|_2=1} \text{cov}(Xu, Yv) \quad (11)$$

271 Here, the linear combination  $\xi = Xu$  and  $\eta = Yv$  are called component scores (or latent variables)  
272 and the  $p$  and  $q$  dimensional combinatory coefficients  $u$  and  $v$  are called loadings. After getting  
273 this first component  $\xi$ , two regression equations (from  $X$  to  $\xi$  and from  $Y$  to  $\xi$ ) were set up:

$$274 \quad X = \xi c' + \varepsilon_1, Y = \xi d' + \varepsilon_2 = Xb + \varepsilon_3 \quad (12)$$

275 Next,  $X$  was deflated as  $X = X - \xi c'$  and  $Y$  was deflated as  $Y = Y - \xi d'$ , and this process was  
276 continued until enough components were extracted.

277 A close relationship exists between PLS and SVD. Let  $M = X'Y$ , then  $\text{cov}(Xu, Yv) = \frac{1}{n} u' M v$ . Let  
278 the SVD of  $M$  be:

$$279 \quad M = U \Delta V'$$

280 where  $U$  ( $p \times r$ ) and  $V$  ( $q \times r$ ) are orthonormal and  $\Delta$  ( $r \times r$ ) is a diagonal matrix whose diagonal  
281 elements  $\delta_k$  ( $k = 1 \dots r$ ) are called singular values. According to the property of SVD, the  
282 combinatory coefficients  $u$  and  $v$  in (7) are exactly the first column of  $U$  and the first column of  
283  $V$ . Therefore, the loadings of PLS can be computed by:

$$284 \quad \min_{u,v} \|M - uv'\|_F^2$$

285 where  $\|M - uv'\|_F^2 = \sum_{i=1}^p \sum_{j=1}^q (m_{ij} - u_i v_j)^2$ .

286 Cao et al. [37] proposed a sparse PLS approach using SVD decomposition of  $M$  by adding a  $\ell_1$   
287 penalty on the loadings. The optimization problem to solve is:

$$288 \quad \min_{u,v} \|M - uv'\|_F^2 + \lambda_1 \|u\|_1 + \lambda_2 \|v\|_1$$

289 As mentioned above, the Huber function is more robust to outliers and has higher statistical  
 290 efficiency than LAD loss, and the Berhu penalty has a better balance between the  $\ell_1$  and  $\ell_2$   
 291 penalty. The Huber loss and the Berhu penalty were adopted to extract each component for PLS.  
 292 The optimization problem becomes:

$$293 \quad \min_{u,v} \sum_{i=1}^p \sum_{j=1}^q H(m_{ij} - u_i v_j) + \lambda \sum_{i=1}^p B(u_i) + \lambda \sum_{i=1}^q B(v_i) \quad (13)$$

294 The objective function in (13) is not convex on  $u$  and  $v$ , but it is convex on  $u$  when  $v$  is fixed and  
 295 convex on  $v$  when  $u$  is fixed. For example, when  $v$  is fixed, each  $u_i$  in parallel can be solved by:

$$296 \quad \min_{u_i} \sum_{j=1}^q H(m_{ij} - u_i v_j) + \lambda B(u_i) \quad (14)$$

297 Similarly, when  $u$  is fixed, each  $v_j$  in parallel can be computed by:

$$298 \quad \min_{v_i} \sum_{i=1}^p H(m_{ij} - u_i v_j) + \lambda B(v_j) \quad (15)$$

299 Equations (14) and (15) can be solved using Algorithm 1. Therefore (9) can be solved iteratively  
 300 by updating  $u$  and  $v$  alternately. Note, it is not cost-efficient to spend a lot of effort optimizing  
 301 over  $u$  in line 6 before a good estimate for  $v$  is computed. Since Algorithm 1 is an iterative  
 302 algorithm, it may make sense to stop the optimization over  $u$  early before updating  $v$ . In the  
 303 implementation, one step of proximal mapping was used to update  $u$  and  $v$ . That is:

$$304 \quad u = \text{Prox}_{t,\lambda B} \left( u - t \frac{\partial H(M - uv')}{\partial u} \right) \quad (16)$$

$$305 \quad v = \text{Prox}_{t,\lambda B} \left( v - t \frac{\partial H(M - uv')}{\partial v} \right) \quad (17)$$

306 The Huber–Berhu PLS regression is detailed in Algorithm 2.

---

Algorithm 2: Huber-Berhu PLS regression

---

Input: TF matrix ( $X$ ), pathway matrix ( $Y$ ), penalty constant ( $\lambda$ ), and number of components ( $K$ )

Output: regression coefficient matrix ( $A$ )

1  $X_0 = X, X_0 = Y, cF = I, A = \mathbf{0}$

2 For  $k$  in  $1 \dots K$

3 set  $M_{k-1} = X'_{k-1} Y_{k-1}$

307           4       Initialize  $\mathbf{u}$  to be the first left singular vector and initialize  $\mathbf{v}$  to be the product of  
 308 first right singular vectors and first singular value.  
 309           5       until convergence of  $\mathbf{u}$  and  $\mathbf{v}$   
 310           6       update  $\mathbf{u}$  using (16)  
 311           7       update  $\mathbf{v}$  using (17)  
 312           8       extract component  $\boldsymbol{\xi} = \mathbf{X}\mathbf{u}$   
 313           9       compute regression coefficients in (8)  $\mathbf{c} = \mathbf{X}'\boldsymbol{\xi}/(\boldsymbol{\xi}'\boldsymbol{\xi})$ ,  $\mathbf{d} = \mathbf{Y}'\boldsymbol{\xi}/(\boldsymbol{\xi}'\boldsymbol{\xi})$   
 314           10      update  $\mathbf{A} = \mathbf{A} + \mathbf{c}\mathbf{F} \cdot \mathbf{u} \cdot \mathbf{d}'$   
 315           11      update  $\mathbf{c}\mathbf{F} = \mathbf{c}\mathbf{F} \cdot (\mathbf{I} - \mathbf{u} \cdot \mathbf{c}')$   
 316           12      compute residuals for X and Y,  $\mathbf{X} = \mathbf{X} - \boldsymbol{\xi}\mathbf{c}'$ ,  $\mathbf{Y} = \mathbf{Y} - \boldsymbol{\xi}\mathbf{d}$   
 317

### 318 **Tuning criteria and choice of the PLS dimension**

319 The Huber-Berhu PLS has two tuning parameters, namely, the penalization parameter  $\lambda$  and the  
 320 number of hidden components  $K$ . To select the best penalization parameter,  $\lambda$ , a common k-fold  
 321 cross-validation (CV) procedure that minimizes the overall prediction error is applied using a grid  
 322 of possible values. If the sample size is too small, CV can be replaced by leave-one-out validation;  
 323 this procedure is also used in [36, 49] for tuning penalization parameters.  
 324

325 To choose the dimension of PLS, the  $Q_h^2$  criteria was adopted.  $Q_h^2$  criteria were first proposed by  
 326 Tenenhaus [50]; These criteria characterize the predictive power of the PLS model by performing  
 327 cross-validation computation.  $Q_h^2$  is defined as:

$$328 \quad Q_h^2 = 1 - \frac{\sum_{k=1}^q PRESS_h^k}{\sum_{k=1}^q RSS_{h-1}^k}$$

329 where  $PRESS_h^k = \sum_{i=1}^n (y_i^k - \hat{y}_{h(-i)}^k)^2$  is the Prediction Error Sum of Squares, and  $RSS_h^k =$   
 330  $\sum_{i=1}^n (y_i^k - \hat{y}_h^k)^2$  is the Residual Sum of Squares for the variable  $k$  and the PLS dimension  $h$ . The  
 331 criterion for determining if  $\xi_h$  contributes significantly to the prediction is:

$$332 \quad Q_h^2 \geq (1 - 0.95^2) = 0.0975$$

333 This criterion is also used in SIMCA-P software [51] and sparse PLS [37]. However, the choice  
 334 of the PLS dimension still remains an open question. Empirically, there is little biological meaning  
 335 when  $h$  is large and good performance appears in 2-5 dimensions.

336

## 337 **Results**

338

### 339 **Validation of Huber-Berhu PLS with lignin biosynthesis pathway genes and regulators**

340 The HB-PLS algorithm was examined for its accuracy in identifying lignin pathway regulators  
341 using the *A. thaliana* microarray compendium data set produced from stem tissues [39]. TFs  
342 identified by HB-PLS were compared to those identified by SPLS. The 50 most relevant TFs in  
343 the lignin biosynthesis pathway were identified using HB-PLS (Figure 3A) and compared to those  
344 identified by SPLS (Figure 3B), respectively. The positive lignin biosynthesis pathway regulators,  
345 which are supported by literature evidence, are shown in coral color. The HB-PLS algorithm  
346 identified 15 known lignin pathway regulators. Of these, MYB63, SND3, MYB46, MYB85,  
347 LBD15, SND1, SND2, MYB103, MYB58, MYB43, NST2, GATA12, VND4, NST1, MYB52,  
348 are transcriptional activators of lignin biosynthesis in the SND1-mediated transcriptional  
349 regulatory network [52], and LBD15 [53] and GATA12 [54] are also involved in regulating  
350 various aspects of secondary cell wall synthesis. Interestingly, SPLS identified the same set of  
351 pathway regulators as HB-PLS, though their ranking orders derived from connectivities to pathway  
352 genes are different.

353

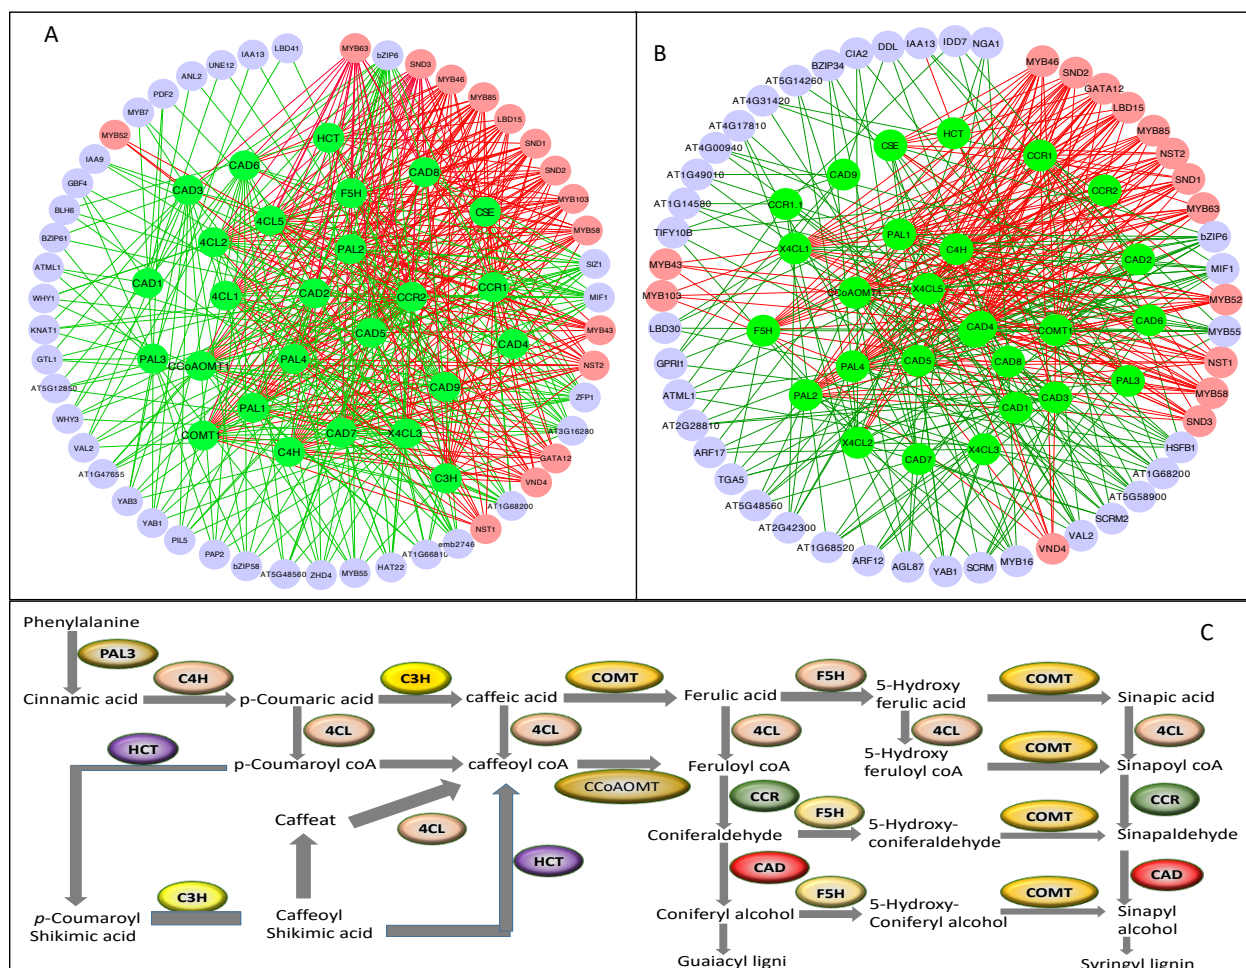

354

355 Figure 3. The 50 most important TFs in the lignin biosynthesis pathway (purple and coral nodes) were identified  
 356 using Huber-Berhu-Partial Least Squares (HB-PLS) (A) and compared to those identified by sparse partial least  
 357 squares (SPLS) (B). Green nodes (inside the circles) represent lignin biosynthesis genes. Coral nodes represent  
 358 positive lignin pathway regulators identified in the literature, and shallow purple nodes contain other predicted  
 359 transcription factors that do not have experimentally validated supporting evidence for the time being.

360

### 361 The performance of HB-PLS with SPLS

362 Since lignin pathway regulators have been well characterized experimentally [55], they are specifically suited  
 363 for determining the efficiency of the HB-PLS method. To do this, we selected two methods, SPLS and PLS,  
 364 as comparisons. For each output TF list to a pathway gene yielded from one of three methods, we applied  
 365 a series of cutoffs, with the number of TFs retained varying from 1 to 40 in a shifting step of 1 at a time,  
 366 and then counted the number of positive regulatory genes in each of the retained lists. The results are shown  
 367 in Figure 4.



368

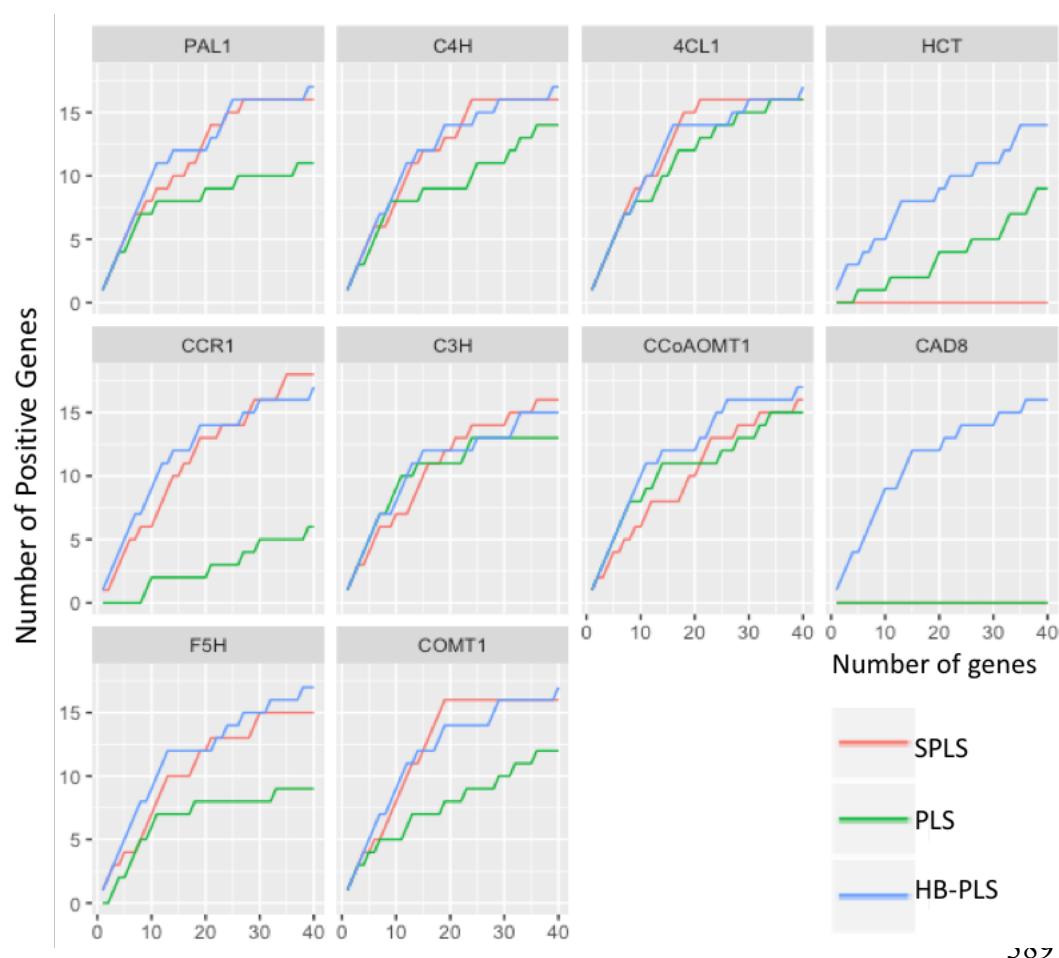

390 Figure 4. The performance of Huber-Berhu-Partial Least Squares (HB-PLS) was compared with  
391 the conventional partial least squares (PLS) and the sparse partial least squares (SPLS) method.

392  
393 The results indicate that the HB-PLS and SPLS methods, in many cases, are much more efficient  
394 in recognizing positive regulators to a pathway gene compared to PLS method. For most pathway  
395 genes, like PAL1, C4H, CCR1, C3H, and COMT1, HB-PLS method could identify more positive  
396 regulators when the top cut-off lists contained fewer than 20 regulators compared to SPLS method.  
397 For HCT, CCoAOMT1, CAD8 and F5H, HB-PLS was almost always more efficient than SPLS  
398 when the top cut-off lists contained fewer than 40 regulators. For pathway gene CAD8, SPLS and  
399 PLS both failed to identify positive regulators while HB-PLS performed efficiently.

400

401 **Prediction of photosynthetic pathway regulators using Huber-Berhu PLS**

402 Photosynthesis is mediated by the coordinated action of about 3,000 different proteins, commonly  
403 referred to as photosynthesis proteins [56]. In this study, we used genes from the photosynthesis  
404 light reaction (PLR) pathway to study which regulatory genes can potentially control  
405 photosynthesis. Analysis was performed using HB-PLS, with SPLS as a comparative method. The  
406 compendium data set we used is comprised of 63 and 36 RNA-seq data sets from maize leaves and  
407 seedlings, respectively. Expression data for 2616 TFs and 30 PLR pathway genes were extracted  
408 from the above compendium data set and used for analyses. The results of HB-PLS and SPLS  
409 methods are shown in Figure 5A and 5B, respectively. HB-PLS identified 14 positive TFs while  
410 SPLS identified 13 positive TFs. Among the 14 positive TFs identified by the HB-PLS method,  
411 NF-YC4 mediates light-controlled hypocotyl elongation by modulating histone acetylation [57].  
412 The chloroplast *psbD* gene encodes the D2 protein of the photosystem II (PSII) reaction center. In  
413 the green alga *Chlamydomonas reinhardtii*, D2 synthesis requires a high-molecular-weight  
414 complex containing the RNA stabilization factor NAC2 [58]. GBF6 is indicated to control CLPB3  
415 in an irradiance-dependent manner [59]; CLPB3 encodes a molecular chaperone involved in  
416 plastid differentiation mediating internal thylakoid membrane formation [60]. The chloroplast  
417 protein phosphatase TAP38/PPH1 is required for efficient dephosphorylation of the light-  
418 harvesting complex II (LHCII) antenna and the state transition from state 2 to state 1 [61]. The  
419 transcription factor bZIP63 is required for adjustment of circadian period by sugars [62]. PIF1  
420 negatively regulates chlorophyll biosynthesis and seed germination in the dark, and light-induced  
421 degradation of PIF1 relieves this negative regulation to promote photomorphogenesis [63]. The  
422 transcription factor HY5 is a key regulator of light signaling, acting downstream of photoreceptors.  
423 HY5 also binds sites in the promoter of the STOMAGEN (STOM) gene, which encodes a peptide  
424 regulator of stomatal development [64]. HY5 also binds and regulates the circadian clock  
425 gene PRR7, which affects the operating efficiency of PSII under blue light [65]. By QTL mapping,  
426 WRKY2 and PRR2 are predicted regulators that control photosynthesis [66]. mTTF is induced by  
427 light (particularly blue light) [67]. mTERF6 is required for photoautotrophic growth early in  
428 development, and *mterf6-5* exhibited reduced growth and defective chloroplasts [68]. Of the TFs  
429 identified by SPLS, mTTF-2 is induced by light (particularly blue light) [67]. REB3 and WRKY11  
430 are predicted TFs that control photosynthesis through QTL mapping [66].  
431 GATA16 controls greening, hypocotyl elongation [69]; TOC1 mis-expressing plants were shown  
432 to have altered ABA-dependent stomata closure [70]. FRS5 is expressed in cotyledons of light-



453 multicollinearity. High dimensionality is caused by a multitude of gene variables while  
454 multicollinearity is largely the result of a large number of genes in a relatively small number of  
455 samples. One method that can circumvent these challenges is partial least squares (PLS), which  
456 couples dimension reduction with a regression model. However, because PLS is not particularly  
457 suited for variable/feature selection, it often produces linear combinations of the original predictors  
458 that are hard to interpret due to high dimensionality [75]. To solve this problem, Chun and Keles  
459 developed an efficient implementation of sparse PLS, referred to as the SPLS method, based on  
460 the least angle regression [76]. SPLS was then benchmarked by means of comparisons to well-  
461 known variable selection and dimension reduction approaches via simulation experiments [75].  
462 We used the SPLS method in our previous study [41] and found that it was highly efficient in  
463 identifying pathway regulators and thus can be used as a benchmark for the development of new  
464 algorithms.

465  
466 In this study, we developed a PLS regression that incorporates the Huber loss function and the  
467 Berhu penalty for identification of pathway regulators using gene expression data. Although the  
468 Huber loss function and the Berhu penalty have been proposed in regularized regression models  
469 [43, 77], this is the first time that both have been used in the PLS regression at the same time. The  
470 Huber function is a combination of linear and quadratic loss functions. In comparison with other  
471 loss functions (e.g., square loss and least absolute deviation loss ), Huber loss is more robust to  
472 outliers and has higher statistical efficiency than the LAD loss function in the absence of outliers.  
473 The Berhu function [33] is a hybrid of the  $\ell_2$  penalty and the  $\ell_1$  penalty. It gives a quadratic penalty  
474 to large coefficients and a linear penalty to small coefficients. Therefore, the Berhu penalty has  
475 advantages of both the  $\ell_2$  and  $\ell_1$  penalties: smaller coefficients will tend to shrink to zero while  
476 the coefficients of a group of highly correlated predictive variables will not be changed much if  
477 their coefficients are large.

478  
479 A comparison of HB-PLS with SPLS suggests that they have comparable efficiencies. The  
480 implementation of HB-PLS and SPLS algorithms for identifying lignin pathway regulators in  
481 *Arabidopsis* led to the identification of 15 positive regulators using each algorithm, and  
482 implementation of the HB-PLS and SPLS algorithms for identifying PLR pathway regulators in  
483 maize resulted in 14 and 13 positive regulators, respectively. The HB-PLS and SPLS algorithms

484 each performed better than the conventional PLS method in identifying positive pathway  
485 regulators. The simulation of performance efficiency of both methods for each of the lignin  
486 pathway genes suggests that HB-PLS identifies more positive regulators in the top of output lists  
487 of pathway regulators that have fewer than 20 TFs. However, as output regulatory gene lists  
488 increase to more than 20 genes, so does the efficiency of SPLS. In the output lists of HB-PLS and  
489 SPLS, the positive regulators share some common genes but their rankings are different, indicating  
490 that the two algorithms have unique specificities that can be used to identify different sets of  
491 positive pathway regulators through modeling GRNs.

492

### 493 **Conclusions**

494 A proximal gradient descent algorithm was developed to solve a regression optimization problem.  
495 In this regression, the Huber function was used as the loss function and the Berhu function was  
496 used as the penalty function. An optimal one-dimensional clustering algorithm was adopted to  
497 cluster the regression coefficients and then the elbow point was used to determine the non-zero  
498 variables. The Huber function is more robust in dealing with outlier and non-Gaussian error while  
499 the Berhu function integrates the advantages of both  $\ell_1$  and  $\ell_2$  penalties. The group effect of the  
500 Huber-Berhu regression makes it suitable for modeling transcriptional regulatory relationships.  
501 Simulation results showed that the Huber-Berhu regression has better performance in identifying  
502 non-zero variables. When modeling the regulatory relationships from TFs to a pathway, HB-PLS  
503 is capable of dealing with the high multicollinearity of both TFs and pathway genes.  
504 Implementation of the HB-PLS to *Arabidopsis* and maize data showed that HB-PLS can identify  
505 comparable numbers of positive TFs in the two pathways tested. However, there were differences  
506 in the pathway regulators identified and their rankings; in particular, positive TFs tended to be  
507 present in highly ranked positions in output lists. This is an advantage for selecting candidate  
508 regulators for experimental validation. Our results indicate that HB-PLS will be instrumental for  
509 identifying novel biological process or pathway regulators from high dimensional gene expression  
510 data.

511

### 512 **Contributions**

513

514 WD developed the methods and implemented the method in R. HW, SL, KZ are involved in  
515 designing and improving the method. CH, ZW and LW were involved in data collection and



516 network construction, interpretation, and plotting. WD, HW and SL wrote the manuscript. KZ,  
517 ZW, SL and HW revised the manuscript.

518

## 519 **Acknowledgements**

520 NSF Plant Genome Program [1703007 to SL and HW]; NSF Advances in Biological Informatics  
521 [dbi-1458130 to HW]; USDA McIntire-Stennis Fund to HW.

522 *Conflict of interest statement.* None declared

523

524

525 References:

526 1. Chen, T., H.L. He and G.M. Church, *Modeling gene expression with differential equations.*  
527 Pac Symp Biocomput, 1999: p. 29-40.

528 2. Kauffman, S., *Homeostasis and differentiation in random genetic control networks.*  
529 Nature, 1969. **224**(5215): p. 177-8.

530 3. Chen, B.S., C.H. Chang, Y.C. Wang, C.H. Wu and H.C. Lee, *Robust model matching*  
531 *design methodology for a stochastic synthetic gene network.* Mathematical biosciences,  
532 2011. **230**(1): p. 23-36.

533 4. Friedman, N., I. Nachman and D. Peer, *Learning bayesian network structure from massive*  
534 *datasets: the 'sparse candidate' algorithm (UAI).* Proceedings of the Fifteenth conference  
535 on Uncertainty in artificial intelligence. 1999: Stockholm: Morgan Kaufmann Publishers  
536 Inc.; pp. 206-15.

537 5. Friedman, N., I. MNachman and D. Peer, *Using Bayesian networks to analyze expression*  
538 *data.* Journal of Computational Biology, 2000. **7**(3-4): p. 601-620.

539 6. Chai, L.E., C.K. Law, M.S. Mohamad, C.K. Chong, Y.W. Choon, S. Deris, and R.M. Illias,  
540 *Investigating the effects of imputation methods for modelling gene networks using a*  
541 *dynamic bayesian network from gene expression data.* Malays J Med Sci, 2014. **21**(2): p.  
542 20-7.

543 7. Exarchos, T.P., G. Rigas, Y. Goletsis, K. Stefanou, S. Jacobs, M.G. Trivella, and D.I.  
544 Fotiadis, *A dynamic Bayesian network approach for time-specific survival probability*  
545 *prediction in patients after ventricular assist device implantation.* Conf Proc IEEE Eng  
546 Med Biol Soc, 2014. **2014**: p. 3172-5.

- 547 8. Cao, J., X. Qi and H. Zhao, *Modeling gene regulation networks using ordinary differential*  
548 *equations*. Methods Mol Biol, 2012. **802**: p. 185-97.
- 549 9. Sima, C., J. Hua and S. Jung, *Inference of Gene Regulatory Networks Using Time-Series*  
550 *Data: A Survey*. Current Genomics, 2009. **10**(6): p. 416-429.
- 551 10. de la Fuente, A., N. Bing, I. Hoeschele and P. Mendes, *Discovery of meaningful*  
552 *associations in genomic data using partial correlation coefficients*. Bioinformatics, 2004.  
553 **20**(18): p. 3565-74.
- 554 11. Schafer, J. and K. Strimmer, *An empirical Bayes approach to inferring large-scale gene*  
555 *association networks*. Bioinformatics, 2005. **21**(6): p. 754-64.
- 556 12. Butte, A. and I. Kohane, *Mutual information relevance networks: Functional genomic*  
557 *clustering using pairwise entropy measurements*. Proceedings of Pacific Symposium on  
558 Biocomputing, 2000. **5**: p. 415-426.
- 559 13. Margolin, A.A., I. Nemenman, K. Basso, C. Wiggins, G. Stolovitzky, R. Dalla Favera, and  
560 A. Califano, *ARACNE: an algorithm for the reconstruction of gene regulatory networks in*  
561 *a mammalian cellular context*. BMC Bioinformatics, 2006. **7 Suppl 1**: p. S7.
- 562 14. Altay, G. and F. Emmert-Streib, *Inferring the conservative causal core of gene regulatory*  
563 *networks*. BMC systems biology, 2010. **4**: p. 132.
- 564 15. Meyer, P.E., F. Lafitte and G. Bontempi, *minet: A R/Bioconductor package for inferring*  
565 *large transcriptional networks using mutual information*. BMC bioinformatics, 2008. **9**: p.  
566 461.
- 567 16. Huynh-Thu, V.A. and P. Geurts, *Unsupervised Gene Network Inference with Decision*  
568 *Trees and Random Forests*. Methods Mol Biol, 2019. **1883**: p. 195-215.
- 569 17. Deng, W., K. Zhang, V. Busov and H. Wei, *Recursive random forest algorithm for*  
570 *constructing multilayered hierarchical gene regulatory networks that govern biological*  
571 *pathways*. PLoS One, 2017. **12**(2): p. e0171532.
- 572 18. Butte, A.J., P. Tamayo, D. Slonim, T.R. Golub and I.S. Kohane, *Discovering functional*  
573 *relationships between RNA expression and chemotherapeutic susceptibility using*  
574 *relevance networks*. Proc Natl Acad Sci U S A, 2000. **97**(22): p. 12182-6.
- 575 19. Faith, J.J., B. Hayete, J.T. Thaden, I. Mogno, J. Wierzbowski, G. Cottarel, S. Kasif, J.J.  
576 Collins, and T.S. Gardner, *Large-scale mapping and validation of Escherichia coli*  
577 *transcriptional regulation from a compendium of expression profiles*. PLoS Biol, 2007.  
578 **5**(1): p. e8.
- 579 20. Margolin, A.A., I. Nemenman, K. Basso, C. Wiggins, G. Stolovitzky, R.D. Favera, and A.  
580 Califano, *ARACNE: an algorithm for the reconstruction of gene regulatory networks in a*  
581 *mammalian cellular context*. BMC bioinformatics, 2006. **7**(Suppl 1): p. S7.



- 582 21. Meyer, P.E., K. Kontos, F. Lafitte and G. Bontempi, *Information-theoretic inference of*  
583 *large transcriptional regulatory networks*. EURASIP journal on bioinformatics and  
584 systems biology, 2007. **2007**: p. 8-8.
- 585 22. Gunasekara, C., K. Zhang, W. Deng, L. Brown and H. Wei, *TGMI: an efficient algorithm*  
586 *for identifying pathway regulators through evaluation of triple-gene mutual interaction*.  
587 Nucleic Acids Res, 2018. **46**(11): p. e67.
- 588 23. Zhang, X., X.M. Zhao, K. He, L. Lu, Y. Cao, J. Liu, J.K. Hao, Z.P. Liu, and L. Chen,  
589 *Inferring gene regulatory networks from gene expression data by path consistency*  
590 *algorithm based on conditional mutual information*. Bioinformatics, 2012. **28**(1): p. 98-  
591 104.
- 592 24. Meinshausen, N. and P. Bühlmann, *High-dimensional graphs and variable selection with*  
593 *the lasso*. The annals of statistics, 2006: p. 1436-1462.
- 594 25. Zhang, X., K. Liu, Z.P. Liu, B. Duval, J.M. Richer, X.M. Zhao, J.K. Hao, and L. Chen,  
595 *NARROMI: a noise and redundancy reduction technique improves accuracy of gene*  
596 *regulatory network inference*. Bioinformatics, 2013. **29**(1): p. 106-13.
- 597 26. Hoerl, A.E. and R.W. Kennard, *Ridge regression: Biased estimation for nonorthogonal*  
598 *problems*. Technometrics, 1970. **12**(1): p. 55-67.
- 599 27. Tibshirani, R., *Regression shrinkage and selection via the lasso*. Journal of the Royal  
600 Statistical Society. Series B (Methodological), 1996: p. 267-288.
- 601 28. Zou, H., *The adaptive lasso and its oracle properties*. Journal of the American Statistical  
602 Association, 2006. **101**(476): p. 1418-1429.
- 603 29. Zou, H. and T. Hastie, *Regularization and variable selection via the elastic net*. Journal of  
604 the Royal Statistical Society Series B-Statistical Methodology, 2005. **67**: p. 301-320.
- 605 30. Wang, H., G. Li and G. Jiang, *Robust regression shrinkage and consistent variable*  
606 *selection through the LAD-Lasso*. Journal of Business & Economic Statistics, 2007. **25**(3):  
607 p. 347-355.
- 608 31. Yu, C. and W. Yao, *Robust linear regression: A review and comparison*. Communications  
609 in Statistics-Simulation and Computation, 2017. **46**(8): p. 6261-6282.
- 610 32. Lambert-Lacroix, S. and L. Zwald, *Robust regression through the Huber's criterion and*  
611 *adaptive lasso penalty*. Electronic Journal of Statistics, 2011. **5**: p. 1015-1053.
- 612 33. Owen, A.B., *A robust hybrid of lasso and ridge regression*. Contemporary Mathematics,  
613 2007. **443**(7): p. 59-72.
- 614 34. Zwald, L. and S. Lambert-Lacroix, *The BerHu penalty and the grouped effect*. arXiv  
615 preprint arXiv:1207.6868, 2012.

- 616 35. Grant, M., S. Boyd and Y. Ye, *CVX: Matlab software for disciplined convex programming*.  
617 2008.
- 618 36. Chun, H. and S. Keleş, *Sparse partial least squares regression for simultaneous dimension*  
619 *reduction and variable selection*. Journal of the Royal Statistical Society: Series B  
620 (Statistical Methodology), 2010. **72**(1): p. 3-25.
- 621 37. Lê Cao, K.-A., D. Rossouw, C. Robert-Granié and P. Besse, *A sparse PLS for variable*  
622 *selection when integrating omics data*. Statistical applications in genetics and molecular  
623 biology, 2008. **7**(1).
- 624 38. Chaffey, N., E. Cholewa, S. Regan and B. Sundberg, *Secondary xylem development in*  
625 *Arabidopsis: a model for wood formation*. Physiol Plant, 2002. **114**(4): p. 594-600.
- 626 39. Kumari, S., W. Deng, C. Gunasekara, V. Chiang, H.S. Chen, H. Ma, X. Davis, and H. Wei,  
627 *Bottom-up GGM algorithm for constructing multilayered hierarchical gene regulatory*  
628 *networks that govern biological pathways or processes*. BMC Bioinformatics, 2016. **17**: p.  
629 132.
- 630 40. Gunasekara, C., J. Lei, J. Marshall, A. Subramanian, G. Tang and H. Wei, *TF-Miner: Web-*  
631 *based Transcription Factor Mining Tools for Identifying Regulatory Genes Controlling a*  
632 *Biological Pathway, Process or Complex Trait Using High-throughput Gene Expression*  
633 *Data* (<http://sys.bio.mtu.edu/>). GigaScience ( Submitted), 2017.
- 634 41. Zheng, J., C. He, Y. Qin, G. Lin, W.D. Park, M. Sun, J. Li, X. Lu, C. Zhang, C.T. Yeh,  
635 C.J. Gunasekara, E. Zeng, H. Wei, P.S. Schnable, G. Wang, and S. Liu, *Co-expression*  
636 *analysis aids in the identification of genes in the cuticular wax pathway in maize*. Plant J,  
637 2019. **97**(3): p. 530-542.
- 638 42. Trapnell, C., B.A. Williams, G. Pertea, A. Mortazavi, G. Kwan, M.J. van Baren, S.L.  
639 Salzberg, B.J. Wold, and L. Pachter, *Transcript assembly and quantification by RNA-Seq*  
640 *reveals unannotated transcripts and isoform switching during cell differentiation*. Nat  
641 Biotechnol, 2010. **28**(5): p. 511-5.
- 642 43. Huber, P.J., *Robust statistics*, in *International Encyclopedia of Statistical Science*. 2011,  
643 Springer. p. 1248-1251.
- 644 44. Yi, C. and J. Huang, *Semismooth newton coordinate descent algorithm for elastic-net*  
645 *penalized huber loss regression and quantile regression*. Journal of Computational and  
646 Graphical Statistics, 2017. **26**(3): p. 547-557.
- 647 45. Parikh, N. and S. Boyd, *Proximal algorithms*. Foundations and Trends® in Optimization,  
648 2014. **1**(3): p. 127-239.
- 649 46. Yu, Y.-L. *On decomposing the proximal map*. in *Advances in Neural Information*  
650 *Processing Systems*. 2013.

- 651 47. Beck, A. and M. Teboulle, *A fast iterative shrinkage-thresholding algorithm for linear*  
652 *inverse problems*. SIAM journal on imaging sciences, 2009. **2**(1): p. 183-202.
- 653 48. Burnham, A.J., R. Viveros and J.F. MacGregor, *Frameworks for latent variable*  
654 *multivariate regression*. Journal of chemometrics, 1996. **10**(1): p. 31-45.
- 655 49. Shen, H. and J.Z. Huang, *Sparse principal component analysis via regularized low rank*  
656 *matrix approximation*. Journal of multivariate analysis, 2008. **99**(6): p. 1015-1034.
- 657 50. Tenenhaus, A., V. Guillemot, X. Gidrol and V. Frouin, *Gene association networks from*  
658 *microarray data using a regularized estimation of partial correlation based on PLS*  
659 *regression*. IEEE/ACM Trans Comput Biol Bioinform, 2010. **7**(2): p. 251-62.
- 660 51. Simca, P., *SIMCA-P+ 10 Manual*. Umetrics AB, 2002.
- 661 52. Zhou, J., C. Lee, R. Zhong and Z.H. Ye, *MYB58 and MYB63 are transcriptional activators*  
662 *of the lignin biosynthetic pathway during secondary cell wall formation in Arabidopsis*.  
663 *Plant Cell*, 2009. **21**(1): p. 248-66.
- 664 53. Shuai, B., C.G. Reynaga-Pena and P.S. Springer, *The lateral organ boundaries gene*  
665 *defines a novel, plant-specific gene family*. Plant Physiol, 2002. **129**(2): p. 747-61.
- 666 54. Nishitani, K. and T. Demura, *An Emerging View of Plant Cell Walls as an Apoplastic*  
667 *Intelligent System*. Plant and Cell Physiology, 2015. **56**(2): p. 177-179.
- 668 55. Zhong, R., C. Lee, J. Zhou, R.L. McCarthy and Z.H. Ye, *A battery of transcription factors*  
669 *involved in the regulation of secondary cell wall biosynthesis in Arabidopsis*. Plant Cell,  
670 2008. **20**(10): p. 2763-82.
- 671 56. Wang, P., R.W. Hendron and S. Kelly, *Transcriptional control of photosynthetic capacity:*  
672 *conservation and divergence from Arabidopsis to rice*. New Phytol, 2017. **216**(1): p. 32-  
673 45.
- 674 57. Tang, Y., X. Liu, X. Liu, Y. Li, K. Wu and X. Hou, *Arabidopsis NF-YCs Mediate the Light-*  
675 *Controlled Hypocotyl Elongation via Modulating Histone Acetylation*. Mol Plant, 2017.  
676 **10**(2): p. 260-273.
- 677 58. Schwarz, C., A.V. Bohne, F. Wang, F.J. Cejudo and J. Nickelsen, *An intermolecular*  
678 *disulfide-based light switch for chloroplast psbD gene expression in Chlamydomonas*  
679 *reinhardtii*. Plant J, 2012. **72**(3): p. 378-89.
- 680 59. Adamiec, M., R. Lucinski and G. Jackowski, *The irradiance dependent transcriptional*  
681 *regulation of AtCLPB3 expression*. Plant Sci, 2011. **181**(4): p. 449-56.
- 682 60. Myouga, F., R. Motohashi, T. Kuromori, N. Nagata and K. Shinozaki, *An Arabidopsis*  
683 *chloroplast-targeted Hsp101 homologue, APG6, has an essential role in chloroplast*  
684 *development as well as heat-stress response*. Plant J, 2006. **48**(2): p. 249-60.

- 685 61. Wei, X., J. Guo, M. Li and Z. Liu, *Structural Mechanism Underlying the Specific*  
686 *Recognition between the Arabidopsis State-Transition Phosphatase TAP38/PPH1 and*  
687 *Phosphorylated Light-Harvesting Complex Protein Lhcb1*. *Plant Cell*, 2015. **27**(4): p.  
688 1113-27.
- 689 62. Frank, A., C.C. Matioli, A.J.C. Viana, T.J. Hearn, J. Kusakina, F.E. Belbin, D. Wells  
690 Newman, A. Yochikawa, D.L. Cano-Ramirez, A. Chembath, K. Cragg-Barber, M.J.  
691 Haydon, C.T. Hotta, M. Vincentz, A.A.R. Webb, and A.N. Dodd, *Circadian Entrainment*  
692 *in Arabidopsis by the Sugar-Responsive Transcription Factor bZIP63*. *Curr Biol*, 2018.  
693 **28**(16): p. 2597-2606 e6.
- 694 63. Moon, J., L. Zhu, H. Shen and E. Huq, *PIF1 directly and indirectly regulates chlorophyll*  
695 *biosynthesis to optimize the greening process in Arabidopsis*. *Proc Natl Acad Sci U S A*,  
696 2008. **105**(27): p. 9433-8.
- 697 64. Zoulias, N., J. Brown, J. Rowe and S.A. Casson, *HY5 is not integral to light mediated*  
698 *stomatal development in Arabidopsis*. *PLoS One*, 2020. **15**(1): p. e0222480.
- 699 65. Litthauer, S., M.W. Battle, T. Lawson and M.A. Jones, *Phototropins maintain robust*  
700 *circadian oscillation of PSII operating efficiency under blue light*. *Plant J*, 2015. **83**(6): p.  
701 1034-45.
- 702 66. Wang, L., Q. Du, J. Xie, D. Zhou, B. Chen, H. Yang, and D. Zhang, *Genetic variation in*  
703 *transcription factors and photosynthesis light-reaction genes regulates photosynthetic*  
704 *traits*. *Tree Physiol*, 2018. **38**(12): p. 1871-1885.
- 705 67. Kleine, T., *Arabidopsis thaliana mTERF proteins: evolution and functional classification*.  
706 *Frontiers in Plant Science*, 2012. **3**.
- 707 68. Robles, P., E. Nunez-Delegido, A. Ferrandez-Ayela, R. Sarmiento-Manus, J.L. Micol and  
708 V. Quesada, *Arabidopsis mTERF6 is required for leaf patterning*. *Plant Science*, 2018.  
709 **266**: p. 117-129.
- 710 69. Ranftl, Q.L., E. Bastakis, C. Klermund and C. Schwechheimer, *LLM-Domain Containing*  
711 *B-GATA Factors Control Different Aspects of Cytokinin-Regulated Development in*  
712 *Arabidopsis thaliana*. *Plant Physiol*, 2016. **170**(4): p. 2295-311.
- 713 70. Legnaioli, T., J. Cuevas and P. Mas, *TOC1 functions as a molecular switch connecting the*  
714 *circadian clock with plant responses to drought*. *EMBO J*, 2009. **28**(23): p. 3745-57.
- 715 71. Lin, R.C. and H.Y. Wang, *Arabidopsis FHY3/FAR1 gene family and distinct roles of its*  
716 *members in light control of arabidopsis development*. *Plant Physiology*, 2004. **136**(4): p.  
717 4010-4022.
- 718 72. Majeran, W., G. Friso, Y. Asakura, X. Qu, M.S. Huang, L. Ponnala, K.P. Watkins, A.  
719 Barkan, and K.J. van Wijk, *Nucleoid-Enriched Proteomes in Developing Plastids and*  
720 *Chloroplasts from Maize Leaves: A New Conceptual Framework for Nucleoid Functions*.  
721 *Plant Physiology*, 2012. **158**(1): p. 156-189.

- 722 73. Crocco, C.D., G.G. Ocampo, E.L. Ploschuk, A. Mantese and J.F. Botto, *Heterologous*  
723 *Expression of AtBBX21 Enhances the Rate of Photosynthesis and Alleviates*  
724 *Photoinhibition in Solanum tuberosum*. Plant Physiol, 2018. **177**(1): p. 369-380.
- 725 74. Vannini, C., F. Locatelli, M. Bracale, E. Magnani, M. Marsoni, M. Osnato, M. Mattana, E.  
726 Baldoni, and I. Coraggio, *Overexpression of the rice Osmyb4 gene increases chilling and*  
727 *freezing tolerance of Arabidopsis thaliana plants*. Plant J, 2004. **37**(1): p. 115-27.
- 728 75. Chun, H. and S. Keles, *Sparse partial least squares regression for simultaneous dimension*  
729 *reduction and variable selection*. J R Stat Soc Series B Stat Methodol, 2010. **72**(1): p. 3-  
730 25.
- 731 76. Efron, B., T. Hastie, I. Johnstone and R. Tibshirani, *Least angle regression*. Annals of  
732 Statistics, 2004. **32**(2): p. 407-499.
- 733 77. Xie, Y., Y. Liu and W. Valdar, *Joint estimation of multiple dependent Gaussian graphical*  
734 *models with applications to mouse genomics*. . arXiv preprint arXiv:1608.08659, 2016.
- 735
